# Supplementary material
Source: MDPI journal article supplement (https://www.mdpi.com/2071-1050/10/11/4137)
Supplement: s1 [file s1]

**Supplementary table.** Overview of the results from the self-assessment of current risk management (RM) practices.

| Category                                                      | Aspect                                                                                             | Enterprise RM Averages |           |                    |           | Product RM Averages |           |                    |           | Process RM Averages |           |
|---------------------------------------------------------------|----------------------------------------------------------------------------------------------------|------------------------|-----------|--------------------|-----------|---------------------|-----------|--------------------|-----------|---------------------|-----------|
|                                                               |                                                                                                    | Company A<br>n = 2     |           | Company B<br>n = 2 |           | Company A<br>n = 4  |           | Company B<br>n = 4 |           | Company A<br>n = 2  |           |
|                                                               |                                                                                                    | Level                  | Certainty | Level              | Certainty | Level               | Certainty | Level              | Certainty | Level               | Certainty |
| I. Organizational Design Experience                           | The group of people carrying out RM activities is familiar with key technologies                   | 8                      | 8         | 7                  | 7         | 8,3                 | 7,5       | 7,3                | 6,3       | 8                   | 8,5       |
|                                                               | The group of people carrying out RM activities is familiar with the supply chain                   | 8                      | 8         | 5                  | 8         | 5,8                 | 6,8       | 6,3                | 6,8       | 6,5                 | 7         |
| II. Risk Management Personnel and Resources                   | Employees are motivated to perform/implement RM                                                    | 5                      | 9         | 5,5                | 7,5       | 6,3                 | 6,8       | 6,3                | 7,3       | 6,5                 | 8,5       |
|                                                               | RM has available, qualified experts to implement the process                                       | 7,5                    | 10        | 4,5                | 5         | 6,8                 | 6,5       | 7,8                | 8,5       | 9,5                 | 9         |
|                                                               | There are sufficient resources (money, time etc.) and personnel to conduct RM                      | 6                      | 10        | 6,5                | 6,5       | 5,8                 | 6,0       | 6,3                | 7,8       | 5,5                 | 8,5       |
| III. Tailoring and Integration of the Risk Management Process | RM is tailored/adjusted to the specific needs and preconditions of the company and its parts (ISO) | 5,5                    | 3         | 6,5                | 6         | 8,0                 | 7,3       | 7,3                | 5,8       | 7,5                 | 7         |
|                                                               | RM is performed throughout all phases of the product innovation process                            | n/a                    | n/a       | n/a                | n/a       | 7,3                 | 6,3       | 5,8                | 7,3       | n/a                 | n/a       |
|                                                               | We coordinate and integrate RM activities of different functions and across the hierarchy          | 6,5                    | 10        | 8                  | 7,5       | 5,3                 | 5,0       | 5,5                | 6,8       | 8,5                 | 8,5       |
|                                                               | RM is integrated with risk management processes on other levels                                    | 7                      | 10        | 5                  | 7,5       | 5,0                 | 6,7       | 5,3                | 6,0       | 6,5                 | 7,5       |
|                                                               | The RM process is effectively integrated with other management processes                           | 7,5                    | 10        | 4,5                | 8         | 6,0                 | 7,3       | 6,8                | 6,8       | 5,5                 | 7,5       |
|                                                               | RM teams are cross-functional and cross organizational                                             | 8,5                    | 7         | 7,5                | 8,5       | 6,3                 | 8,7       | 7,3                | 7,3       | 7,5                 | 8         |
|                                                               | Risks and RM activities are communicated to stakeholders                                           | 9                      | 10        | 6,5                | 7         | 7,3                 | 8,3       | 7,8                | 7,0       | 7                   | 8         |
|                                                               | RM is transparent and inclusive towards all stakeholders (ISO)                                     | 6,5                    | 10        | 6                  | 8         | 6,0                 | 6,7       | 6,3                | 6,5       | 6                   | 8         |
|                                                               | RM in general is an integral part of all organizational processes (ISO)                            | 7,5                    | 7         | 6                  | 8         | 5,7                 | 6,7       | 6,8                | 7,0       | 6,5                 | 7,5       |
|                                                               | There are go/no-go decisions made based on risk assessments                                        | 5                      | 5         | 8,5                | 8,5       | 7,3                 | 7,7       | 7,3                | 7,3       | 7,5                 | 7,5       |
| IV. Risk-Based Decision Making                                | Resources are allocated to address the largest risks as early as possible                          | 6,5                    | 6         | 8                  | 7,5       | 7,3                 | 7,3       | 6,0                | 6,5       | 8,5                 | 8,5       |

|                                                                |                                                                                                                   |     |     |     |     |     |     |     |     |     |     |
|----------------------------------------------------------------|-------------------------------------------------------------------------------------------------------------------|-----|-----|-----|-----|-----|-----|-----|-----|-----|-----|
| V. The relation between risk management and goals and strategy | The upside of risk (opportunities) is systematically and effectively included in risk management                  | 3,5 | 8   | 4,5 | 7,5 | 4,7 | 6,0 | 5,8 | 6,8 | 8   | 8   |
|                                                                | Forecasts/ projections (e.g. cost, schedule, performance) are adjusted based on risk assessment                   | 5,5 | 6   | 7   | 8   | 5,0 | 6,7 | 6,0 | 6,3 | 8   | 8,5 |
|                                                                | The results of the risk analysis are considered in making trade-offs                                              | 3,5 | -   | 8,5 | 8,5 | 5,3 | 7,0 | 7,0 | 6,0 | 7,5 | 8   |
|                                                                | Decisions are made based on risk-benefit trade-offs                                                               | 5,5 | 6   | 6,5 | 8   | 6,3 | 7,0 | 6,0 | 6,3 | 7,5 | 8   |
|                                                                | Risk-benefit trade-offs are used systematically                                                                   | 3   | 3   | 6,5 | 7,5 | 5,0 | 6,0 | 5,8 | 5,8 | 6   | 6,5 |
|                                                                | Contracts are derived from detailed cost risk assessments                                                         | 5,5 | 3   | 6,5 | 3,5 | 6,0 | 6,3 | 5,3 | 5,3 | n/a | n/a |
|                                                                | Risks are escalated to according to guidelines                                                                    | 8   | 9   | 5   | 8,5 | 6,3 | 7,3 | 6,0 | 6,5 | 8,5 | 9   |
|                                                                | RM is a central part of decision making (ISO)                                                                     | 9   | 7   | 5   | 6,5 | 5,0 | 5,3 | 7,0 | 6,3 | 8,5 | 9   |
|                                                                | Identified risks are quantified on scales for probability and impact, e.g. 1-5                                    | 9   | 10  | 9   | 8   | 9,0 | 9,3 | 7,3 | 6,8 | 10  | 10  |
|                                                                | The impacts of risks are quantified using cost as a dimension                                                     | 7,5 | 7,5 | 8   | 7   | 8,0 | 7,3 | 6,8 | 6,5 | 2,5 | 8   |
|                                                                | The impacts of risks are quantified using technical performance or quality as a dimension                         | 5   | 6,5 | 4,5 | 5   | 8,8 | 8,3 | 7,3 | 7,5 | 6,5 | 7   |
|                                                                | The impacts of risks are quantified using schedule as a dimension                                                 | 6,5 | 6,5 | 4,5 | 5   | 6,8 | 7,8 | 7,8 | 7,5 | 3,5 | 6   |
|                                                                | Before they are implemented, risk mitigation actions are evaluated based on the reduction of impact or likelihood | 6   | 5   | 6,5 | 7,5 | 6,0 | 8,3 | 6,5 | 7,3 | 8   | 8,5 |
|                                                                | Risk assessments are used to set more realistic or achievable objectives                                          | 3,5 | 5   | 4,5 | 7,5 | 6,0 | 6,7 | 6,3 | 6,8 | 6   | 6   |
|                                                                | Business areas create long-term action plans to meet risk management goals                                        | 8   | 8   | 4   | 6,5 | n/a | n/a | n/a | n/a | n/a | n/a |
|                                                                | Organizational and business area goals are documented, measured, reported, and managed                            | 9   | 10  | 7,5 | 7,5 | n/a | n/a | n/a | n/a | n/a | n/a |
|                                                                | Risk assessments are used to determine potential effects (i.e. losses or gains) on goals                          | 6,5 | 8   | 5   | 7   | n/a | n/a | n/a | n/a | n/a | n/a |
|                                                                | Business units report on how external and internal events impact their business models and strategic goals        | 7,5 | 9   | 7,5 | 6   | n/a | n/a | n/a | n/a | n/a | n/a |
|                                                                | Organizational goals are tied to specific performance measures                                                    | 8,5 | 10  | 7,5 | 6,5 | n/a | n/a | n/a | n/a | n/a | n/a |
|                                                                | Employees understand the potential effects of the organization's top risks on important strategic goals           | 4,5 | 7   | 4,5 | 5   | n/a | n/a | n/a | n/a | n/a | n/a |
|                                                                | RM is a formal part of goal/requirement setting                                                                   | 6   | 6   | 4   | 4,5 | n/a | n/a | n/a | n/a | n/a | n/a |

|                                                |                                                                                                          |     |    |     |     |     |     |     |     |     |     |
|------------------------------------------------|----------------------------------------------------------------------------------------------------------|-----|----|-----|-----|-----|-----|-----|-----|-----|-----|
| VI. Specific mitigation actions                | The implications of lower level risks on high level risks and vice versa are considered and acted upon   | 7   | 8  | 7   | 7,5 | 7,7 | 7,0 | 5,5 | 5,5 | 7,5 | 7   |
|                                                | Self-assessments, continuous improvement and implementation of best practices are used                   | 7,5 | 9  | 6,5 | 7,5 | 6,3 | 6,0 | 6,5 | 6,0 | 9   | 9,5 |
|                                                | Standard work/processes are defined to increase process reliability                                      | 9   | 10 | 8   | 8   | 7,0 | 5,8 | 7,5 | 7,5 | 8,5 | 8,5 |
| VII. Monitoring and review                     | Risks are regularly re-assessed according to guidelines, e.g. after specific events or a certain time    | 9   | 10 | 4,5 | 6,5 | 6,3 | 7,0 | 6,8 | 6,3 | 7,5 | 9,5 |
|                                                | The RM process is regularly reviewed and improved                                                        | 6,5 | 4  | 4,5 | 5   | 5,7 | 7,7 | 6,8 | 7,3 | 6,5 | 8,5 |
|                                                | RM is dynamic, iterative and responsive to change (ISO)                                                  | 8   | 8  | 5,5 | 4   | 4,8 | 5,3 | 7,0 | 7,5 | 7   | 7   |
|                                                | A formal feedback system is used to monitor the execution of risk mitigation actions                     | 5   | 8  | 7,5 | 3,5 | 6,0 | 7,3 | 7,0 | 7,3 | 4   | 6,5 |
|                                                | Risk mitigation plans are used for monitoring                                                            | 8   | 8  | 7   | 4   | 6,7 | 7,0 | 5,8 | 7,3 | 4   | 6,5 |
|                                                | An early warning system is used to track critical risks and decide on activating mitigation measures     | 5   | 8  | 6   | 3,5 | 5,0 | 6,3 | 6,5 | 7,0 | 3   | 6,5 |
|                                                | Tracking of error/issue/failure rates is used as a key performance indicator to track risks              | 6   | 6  | 8   | 6   | 5,0 | 5,7 | 7,8 | 7,8 | 5   | 8   |
| VIII. Remaining ISO Risk Management Principles | RM explicitly addresses uncertainty (ISO)                                                                | 7   | -  | 5   | 3,5 | 6,3 | 6,5 | 7,0 | 7,3 | 5,5 | 7,5 |
|                                                | RM is systematic, structured and timely (ISO)                                                            | 8   | 10 | 5   | 4,5 | 6,8 | 6,5 | 7,0 | 6,3 | 8   | 8,5 |
|                                                | RM is based on the best available information (ISO)                                                      | 7   | 9  | 8   | 6,5 | 7,7 | 7,3 | 7,8 | 7,8 | 8,5 | 8,5 |
|                                                | RM takes human and cultural factors into account (ISO)                                                   | 7   | 9  | 7,5 | 6,5 | 3,3 | 3,3 | 7,8 | 8,0 | 6,5 | 8,5 |
|                                                | RM creates and protects value (ISO)                                                                      | 8   | 9  | 8   | 6,5 | 5,0 | 4,8 | 8,3 | 8,3 | 9   | 9,5 |
|                                                | RM facilitates continuous improvement in the organization (ISO)                                          | 8,5 | 10 | 7,5 | 6,5 | 3,7 | 4,7 | 7,0 | 6,8 | 10  | 9   |
| IX. Sustainability Risk Management             | Societal trends, relevant for the business, are identified, monitored, and considered in risk management | 4,5 | 8  | 7   | 6,5 | 3,5 | 4,3 | 6,5 | 6,8 | 5   | 5   |
|                                                | There is a clear understanding of what sustainability risks are                                          | 5,5 | 7  | 5   | 7   | 3,8 | 4,8 | 4,3 | 5,8 | 5   | 7   |
|                                                | Sustainability risks are systematically identified, assessed and treated                                 | 7   | 9  | 3,5 | 5,5 | 3,5 | 4,5 | 5,0 | 6,3 | 4   | 4   |
|                                                | The connections between sustainability risks and other risks are actively identified and managed         | 7   | 8  | 2   | 5   | 2,8 | 3,5 | 4,3 | 6,0 | 4   | 4   |
|                                                | Sustainability risk management includes both environmental and social aspects                            | 7   | 8  | 6,5 | 7,5 | 2,8 | 3,3 | 5,3 | 6,3 | 4   | 4   |
